# Supplementary material for: A novel BMX variant promotes tumor cell growth and migration in lung adenocarcinoma
Source: PubMed Central journal article supplement (PMC5464877; doi:10.18632/oncotarget.16796), 2017-04-03
Supplement: oncotarget-08-33405-s001.pdf [file oncotarget-08-33405-s001.pdf]

## A novel BMX variant promotes tumor cell growth and migration in lung adenocarcinoma

### Supplementary Materials

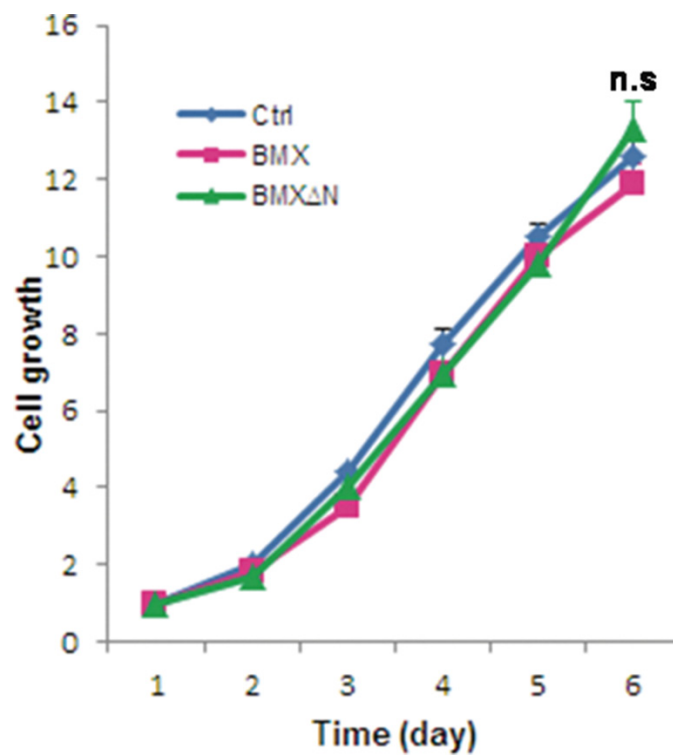

Supplementary Figure 1: Cell proliferation detection of PC9 cells with or without BMX and BMXΔN expression. Statistical analysis was performed using Student's *t* test (n.s: not significant).
